1 **The paradox of obligate sex: the roles of**  
2 **sexual conflict and mate scarcity in transitions**  
3 **to facultative and obligate asexuality**

4

5 Nathan W Burke, Russell Bonduriansky

6 Evolution & Ecology Research Centre, School of Biological, Earth and Environmental

7 Sciences, University of New South Wales Australia, Sydney, New South Wales, Australia.

8

9 Keywords: maintenance of sex, facultative parthenogenesis, reproductive modes, sexual  
10 conflict, sexually antagonistic coevolution, individual-based model.

11

12

13 **ACKNOWLEDGEMENTS**

14 Thanks to A. Crean, A. Hooper, Z. Wylde, E. Macartney and A. Runagall-McNaull for helpful  
15 discussions on model design. We confirm that we have no conflicts of interest in the  
16 production of this work.

17

18

19

20 **ABSTRACT**

21 Recent theory suggests that male coercion could contribute to the maintenance of obligate  
22 sex. However, it is unclear how sexually antagonistic coevolution might interact with mate  
23 scarcity to influence the probability of invasions of obligately sexual populations by mutants  
24 capable of parthenogenetic reproduction. Furthermore, if invasion does occur, it is unclear  
25 which factors promote or prevent the complete loss of sex. Using individual-based models,  
26 we show that male coercion cannot prevent the invasion of a mutant allele that gives virgin  
27 females the ability to reproduce parthenogenetically because mutants always benefit by  
28 producing at least some offspring asexually prior to mating. Indeed, the likelihood of invasion  
29 generally increases as sexual conflict intensifies, and the effects of sexual conflict and mate  
30 scarcity can interact in complex ways to promote invasion. Nonetheless, we find that  
31 coercion prevents the complete loss of sex unless linkage disequilibrium can build up  
32 between the mutant allele and alleles for effective female resistance. Our findings clarify how  
33 costs and limitations of female resistance can promote the maintenance of sexual  
34 reproduction, turning sex into an evolutionary trap. At the same time, our results highlight the  
35 need to explain why facultative reproductive strategies so rarely evolve in nature.

36

37

38

39

40

## 41 INTRODUCTION

42 The prevalence of costly obligate sexual reproduction in some groups of organisms,  
43 especially animals, represents a paradox (Burke and Bonduriansky 2017). Theory suggests  
44 that facultative strategies that incorporate both sexual and asexual reproduction provide all  
45 the genetic advantages of obligate sex but with much lower costs (Green and Noakes 1995;  
46 D'Souza and Michiels 2010). For example, facultative sex/asex is as effective as obligate  
47 sex at enhancing purifying selection (Lynch and Gabriel 1983; Wagner and Gabriel 1990),  
48 creating advantageous allele combinations (Kondrashov 1984; Bell 1988; Hurst and Peck  
49 1996), promoting adaptation (Lynch and Gabriel 1983; Sasaki and Iwasa 1987), and  
50 facilitating evolutionary escape from coevolving parasites (Yamauchi 1999; Flatt et al. 2001;  
51 Yamauchi and Kamite 2003). Thus, to explain the paradox of obligate sex, theory must  
52 account for the capacity of obligately sexual populations to resist invasions by facultatively  
53 asexual mutants (Burke and Bonduriansky 2017).

54 The widespread occurrence of obligate sexuality suggests the existence of mechanisms or  
55 dynamics that act as persistent impediments to evolutionary transitions to facultative or  
56 obligate asexuality in diverse sexual lineages. One possible mechanism that could impede  
57 such transitions is coercion by males (Kawatsu 2013a,b, 2015; Burke et al. 2015; Gerber  
58 and Kokko 2016; Burke and Bonduriansky 2017). Males typically benefit from each  
59 additional mating whereas females have a lower optimum mating rate, and selection  
60 therefore favours male strategies that coerce females into mating even if this results in  
61 reduced female fecundity or longevity (Parker 1979; Martin and Hosken 2003; Arnqvist and  
62 Rowe 2005; Maklakov et al. 2005). In a sexual population, a mutant allele that makes  
63 parthenogenetic reproduction possible may be expected to flourish due to the demographic  
64 advantage of producing all-female offspring (Maynard Smith 1978), as well as the ecological  
65 and physiological advantages of reproduction without costs of mating. However, coercion  
66 could directly inhibit the spread of parthenogenesis by forcing facultative mutants to  
67 reproduce sexually, since in many facultatively asexual diploid animals only virgin females

68 are able to reproduce parthenogenetically (Bell 1982). Parthenogenesis may also fail to  
69 spread if facultative mutants lose more fitness than sexual females after encountering  
70 coercive males. For example, sperm or other male factors could interfere with the proper  
71 development of parthenogenetic eggs or offspring (Burke and Bonduriansky n.d.; Scharl et  
72 al. 1997; Kawatsu 2013b), or mating could result in increased mortality or reduced fecundity  
73 in parthenogenetically reproducing females (Burke et al. 2015). However, male coercion can  
74 select for female resistance, potentially setting off a sexual “arms race” (Rice and Holland  
75 1997; Holland and Rice 1998; Gavrillets 2000). Thus, females’ capacity to coevolve effective  
76 resistance could play an important role in counteracting the suppressive effect of coercion on  
77 parthenogenetic reproduction (Kawatsu 2013a; Burke et al. 2015; Gerber and Kokko 2016;  
78 Burke and Bonduriansky 2017).

79 Conditions that lead to mate scarcity, such as small population sizes or skewed sex ratios,  
80 are also thought to be important in the evolution of facultative parthenogenesis in a number  
81 of animal groups – including some phasmatids (Schwander and Crespi 2009),  
82 ephemeropterids (Brittain 1982), and dipterans (Markow 2013) – because asexual  
83 reproduction provides reproductive assurance when females fail to find a mate (Gerritsen  
84 1980; Johnson 1994). The likelihood of encountering mates therefore has the potential to  
85 interact with sexually antagonistic selection to either promote or hinder parthenogenesis. A  
86 recent theoretical analysis showed that female resistance to mating is more effective at  
87 promoting high incidences of parthenogenetic reproduction if population densities are low  
88 (Gerber and Kokko 2016); while another theoretical study suggests that obligate  
89 parthenogenesis is more likely to evolve if facultative mutants can acquire high resistance  
90 (Kawatsu 2013a). However, no previous study has investigated the roles of sexual conflict  
91 and mate scarcity simultaneously in an invasion context.

92 To fill this gap, we investigate how sexual conflict mediated by male coercion interacts with  
93 mate scarcity to influence the probability of successful invasion of obligately sexual  
94 populations by facultative mutants. Furthermore, if invasion does occur, we investigate the

95 conditions whereby sex is lost through the extinction of males. To address these questions,  
96 we employed a series of individual-based simulation models (IBMs) that varied in intensity of  
97 sexual conflict, dynamics of sexual coevolution, ecological conditions, genetic background,  
98 and relative fecundity of sexual versus parthenogenetic reproductive strategies.

99

## 100 **METHODS**

### 101 ***Overview of IBMs***

102 Using individual-based simulation models (IBMs) in the program NetLogo (Wilensky 1999),  
103 we consider a finite population of diploid organisms with overlapping generations inhabiting a  
104 gridded environment of square patches in an essentially spherical world. This explicit spatial  
105 structure enabled us to create high and low population densities, which are known to affect  
106 evolutionary outcomes in facultative systems (Gerber and Kokko 2016), by setting the  
107 number of patches to low (11 x 11) and high (51 x 51), respectively. The low density setting  
108 simulates conditions that organisms at high risk of mating failure are likely to experience in  
109 wild populations (Greenway et al. 2015), and for which, in principle, facultative  
110 parthenogenesis would be strongly beneficial for reproductive assurance (Gerritsen 1980);  
111 whereas the high-density setting generates high rates of male-female encounter and  
112 therefore reduces likelihood of mate scarcity but promotes sexual conflict.

113 The sexes in our models experience sexual conflict over mating rate. We assume that any  
114 more than one mating is costly for females and multiple matings are beneficial for males  
115 (Arnqvist and Rowe 2005). We model coercion and resistance in two ways. First, we define  
116 coercion and resistance as discrete traits, each controlled by a diploid autosomal locus with  
117 two alleles,  $c$  and  $C$ , and  $r$  and  $R$ , respectively, with additive, sex-limited effects (see Table  
118 1). These 'discrete-trait' models investigate cases where one sex gains the upper hand via  
119 sexually antagonistic coevolution. Males can gain the upper hand when the  $CC$  coercion  
120 genotype is set to beat all female resistance genotypes (hereafter, 'coercion' models),

121 whereas females can gain the upper hand when the *RR* resistance genotype is set to beat  
122 all male coercion genotypes (hereafter, ‘resistance’ models; see Table 1). Sexually  
123 antagonistic coevolution occurs via selection on standing genetic variation at those two loci,  
124 allowing populations to stabilize at coercion-dominated or resistance-dominated states.  
125 Second, in a separate set of models (‘continuous-trait models’), we simulate an escalating  
126 arms race where coercion and resistance are treated as continuously distributed values  
127 (representing a large mutational target) and allowed to coevolve without limit via selection on  
128 both standing and mutation variation (see Supplementary Material).

129 We assume that a single sex-limited autosomal locus with two alleles, *p* and *P*, controls  
130 reproductive mode. Wild-type *pp* individuals are capable only of sexual reproduction, while *P*  
131 is a dominant mutant allele that allows females to reproduce prior to mating (i.e., via  
132 facultative parthenogenesis). The *P* allele is introduced either at time-step 0 before the  
133 sexes can coevolve, or at time-step 10,001 after sexually antagonistic selection has altered  
134 coercion and resistance allele frequencies. We hereafter refer to discrete-trait models set up  
135 this way as incorporating ‘no prior sexual coevolution’ versus ‘prior sexual coevolution’,  
136 respectively. The *P* allele arises in a random sample of individuals, with 1% of males and 1%  
137 of females becoming *PP*, and 1% of males and 1% of females becoming *Pp*. This frequency  
138 of *P* alleles limits the extinction of facultative mutants due to drift.

### 139 ***Initialization of simulations***

140 Simulations start with 500 females and 500 males randomly distributed across patches, each  
141 with a fixed lifespan of 100 time-steps and an age of 0 that increases by 1 every time-step.  
142 In discrete-trait models, males and females are both allocated coercion and resistance  
143 genotypes according to Hardy-Weinberg probabilities and linkage equilibrium, with an allele  
144 frequency of 0.5. The carrying capacity of the environment (i.e., maximum population size) is  
145 2,500.

146 ***Life cycle***

147 During each time-step, individuals perform tasks in four ordered phases: moving, mating,  
148 reproducing and dying. In the moving phase, individuals turn to face a new direction between  
149 0 and 90 degrees relative to their current direction which is decided by drawing a random  
150 number from a uniform distribution with limits 0 and 90. Individuals then move forward one  
151 unit (the length of a patch).

152 During the mating phase, each male randomly chooses a female in his patch that has not  
153 mated in the current time-step and tries to mate with her. Males can make only one attempt  
154 at mating per time-step, but females can be courted sequentially within a time-step by more  
155 than one male if successive mating attempts in a time-step are unsuccessful. Mating occurs  
156 when a male's coercion genotype beats the resistance genotype of the female (see Table 1).

157 Resistance is either costly or non-costly for females. When resistance is costly, females  
158 incur a 10-time-step reduction to their remaining lifespan every time they successfully resist  
159 a mating attempt. Following convention (e.g., (Hårdling and Kaitala 2005)), we assume that  
160 females store enough sperm from one mating to fertilize all their eggs until the end of their  
161 life, and that a female's last mate sires her subsequent offspring.

162 Males and females incur sex-specific survival costs of mating, applied as penalties of 0, 5,  
163 10, 15 or 20 time-steps deducted from an individual's remaining lifespan. When the female  
164 mating cost is  $> 0$ , mating more than once is costly for females, whereas male fitness  
165 increases with each additional mating regardless of the cost. Cost of mating to females  
166 therefore reflects the intensity of sexual conflict.

167 Reproduction is a lottery that occurs every time-step if the current population size is less  
168 than the carrying capacity. Each female capable of reproducing is allotted a random number  
169 from a uniform distribution between 0 and 1. Previously mated females with a random  
170 number  $< 0.1$  reproduce sexually. For virgin females that carry the *P* allele, reproduction  
171 probability per time-step is globally set at either 0.1 (as for previously mated females) or 0.05

172 (representing 50%-reduced parthenogenetic fecundity, reflecting a genetic/physiological  
173 constraint on asexuality (Lamb and Willey 1979; Engelstadter 2008)). Females can win the  
174 reproductive lottery multiple times, but only produce one offspring per reproductive bout.  
175 Mated females produce daughters and sons with equal probability, whereas  
176 parthenogenesis results in daughters only. As occurs in many facultatively parthenogenetic  
177 taxa (Bell 1982), females that mate reproduce sexually thereafter, even if they carry the  $P$   
178 allele. Although sexual recombination can provide long-term genetic advantages (Hamilton  
179 1980; Kondrashov 1988; Otto and Barton 1997; Peck and Waxman 2000), we ignore these  
180 potential benefits to focus solely on short-term invasion dynamics.

181 Offspring inherit parental alleles and trait values for reproductive mode, coercion, and  
182 resistance. We assume that daughters of unmated mothers are produced via apomixis, the  
183 most common mechanism of animal parthenogenesis (Bell 1982), and therefore inherit their  
184 mothers' complete genotype. Sexually produced offspring inherit parental alleles following  
185 Mendelian rules of segregation.

186 Following reproduction, an individual's survival value,  $S$ , is determined as:

$$187 \quad S = 1 - \left( \frac{a+bm}{L} \right)$$

188 where  $a$  is an individual's current age in time-steps,  $b$  is the sex-specific cost of mating in  
189 time-steps,  $m$  is an individual's cumulative number of matings, and  $L$  is the potential lifespan  
190 at birth (set at 100 in all models). Death occurs when  $S \leq 0$ .

## 191 **Analysis**

192 We performed 25 simulation runs for each unique parameter combination of discrete-trait  
193 and continuous-trait models to determine the proportion of simulations that ended in  $P$  allele  
194 fixation,  $P$ - $p$  polymorphism or  $P$  allele extinction, and the proportion that ended in obligate  
195 sex, facultative parthenogenesis, obligate parthenogenesis (male extinction) or population  
196 extinction. In one additional run, we collected data every time-step on population size, sex



197 ratio,  $P$  allele frequency, mean lifetime mating costs, coercion and resistance genotype  
198 frequencies, and number of offspring. All simulation runs lasted 20,000 time-steps following  
199 the emergence of the  $P$  allele, except in cases of prior population extinction. Because  
200 outcomes for both discrete-trait and continuous-trait models were broadly consistent, we  
201 focus below on discrete-trait models, and briefly compare results for those models with  
202 outcomes from continuous-trait models. A detailed description of and full results for  
203 continuous-trait models are provided in the Supplementary Materials. A list of all model  
204 parameters used in discrete-trait models is provided in Table 2.

205 Prior to the introduction of the  $P$  allele in discrete-trait models, relative costs of mating for  
206 each sex had consistent demographic effects, with higher costs for one sex generating  
207 strongly biased sex ratios (see the first 10,000 time-steps of Figures S1 *A* and *B*). Since  
208 large deviations from equal sex ratio are likely to represent extreme cases, we focus below  
209 on simulations where male and female costs of mating are balanced, and sex ratios  
210 therefore remain approximately equal. We report  $P$ -allele and reproductive-mode outcomes  
211 for all mating cost combinations in Supplementary Materials (Figure S2).

212

## 213 **RESULTS**

### 214 ***Conditions for the invasion of the $P$ allele***

215 We find that the  $P$  allele spreads via two interacting mechanisms: the ability to reproduce  
216 asexually prior to encountering any males (mate scarcity), and the ability to reproduce  
217 asexually by resisting males (sexual conflict). The mate scarcity mechanism contributes to  
218 the spread of the  $P$  allele in all versions of the discrete-trait model, including coercion models  
219 where males can evolve to coerce any female to mate (Figure 1 *A*). Mate scarcity promotes  
220 the spread of the  $P$  allele in coercion models because at least some virgin females fail to  
221 encounter a male by chance, regardless of the effectiveness of male coercion, and the  $P$   
222 allele gives these females the opportunity to reproduce parthenogenetically. Separate

223 analyses (not shown) confirm that the *P* allele spreads because of this general fecundity  
224 advantage and not due to drift. This shows that, under our assumptions, sexual conflict  
225 mediated by male coercion cannot impede the invasion of a facultative strategy.

226 In resistance models, positive linkage disequilibrium develops between the *R* allele and the  
227 *P* allele, especially when resistance is cost-free, creating strong positive epistasis for female  
228 fitness when the capacity for parthenogenesis is coupled with high resistance (Figure 2).  
229 When linkage disequilibrium can build up, resistance plays a greater role than mate scarcity  
230 in promoting the spread of parthenogenesis during initial stages of invasion (Figure 3 *B*).  
231 However, as invasions progress and sexual encounters per female decline with shrinking  
232 male sex-ratio as more and more parthenogens are produced, mate scarcity becomes the  
233 dominant driver of the *P* allele's spread (Figure 3 *B*). Likewise, in coercion models with no  
234 prior sexual coevolution, resistance partially contributes to the spread of the *P* allele  
235 immediately following its introduction because some resistance is still possible at this stage  
236 (Figure 3 *A*). However, the *C* allele eventually fixes in these models, and mate scarcity then  
237 becomes the sole mechanism by which the *P* allele can spread (Figure 3 *A*). This shows that  
238 mate scarcity contributes to *P* allele invasions regardless of whether effective resistance can  
239 evolve, but sexual conflict can promote the invasion of facultative mutants if alleles for  
240 effective resistance are present in the population and if resisting matings is not too costly.

241 The timing of the *P* allele's introduction also determines whether positive epistasis for fitness  
242 between parthenogenesis and resistance develops. This is because the amount of standing  
243 genetic variation for antagonistic traits varies depending on whether populations experience  
244 sexual coevolution prior to the mutant allele's introduction. In resistance models with prior  
245 coevolution, linkage disequilibrium between the *P* and *R* alleles is unable to build up  
246 because females with high resistance fail to mate and reproduce, and selection rapidly  
247 eliminates the *R* allele from the population before facultative mutants arise (Figure 4 *B*).  
248 However, in resistance models without prior sexual coevolution, genetic variation for  
249 resistance is available and thus the *P* allele can rapidly associate with high resistance

250 genotypes and invade over a larger range of the parameter space, especially when  
251 resistance is cost-free (Figure 1 *B*). By contrast, timing of introduction has less effect on the  
252 *P* allele's spread in coercion models (Figure 1 *A*) because high coercion rapidly evolves to  
253 beat resistance irrespective of prior sexual coevolution (Figure 4 *A* and *C*).

254 The intensity of sexual conflict, reflecting costs of mating for females, also plays an important  
255 role in determining the success of *P* allele invasions. When there is no sexual conflict over  
256 mating rate (i.e., female cost per mating = 0), extinction of the *P* allele via drift is common  
257 (see Figure 1 *A*). However, as the cost per mating increases, sexual conflict enhances the  
258 invasion probability of the *P* allele (see Figure 1 *A* and *B*). In high density populations where  
259 mating rates per female are very high, female lifespan and opportunities to reproduce  
260 decrease with increasing costs of mating, sending populations on a downward spiral to  
261 extinction (Figure 1 *A* and *B*). (Resistance costs increase rates of extinction because high  
262 density increases the rate of mating attempts and further reduces female lifespan.) These  
263 conditions of declining population size are associated with increased rates of *P* allele fixation  
264 because the capacity to reproduce without mating is strongly favoured as populations  
265 decline and mates become scarce. Together, these results suggest that intense sexual  
266 conflict can promote the invasion of alleles for facultative parthenogenesis, thereby  
267 potentially averting population extinction.

### 268 ***Conditions for the establishment of obligate parthenogenesis***

269 We find that the introduction of *P*-allele-carrying mutants into obligately sexual populations  
270 leads to one of three distinct evolutionary outcomes: (1) The *P* allele dies out, leaving  
271 populations to reproduce via obligate sex; (2) The *P* allele spreads either to an intermediate  
272 frequency or to fixation, with males able to persist in the population thereby allowing sex and  
273 parthenogenesis to coexist between and/or within individuals (i.e., facultative  
274 parthenogenesis); (3) The *P* allele spreads to fixation and parthenogenesis becomes  
275 obligate as a result of the complete extinction of males (Figure 2 *C* and *D*). Facultative  
276 parthenogenesis and obligate sex are the most common evolutionary outcomes in coercion

277 models because highly coercive males ensure the continued production of male offspring by  
278 fertilising eggs of at least some facultatively parthenogenetic females (Figure 1 C and D). By  
279 contrast, obligate and facultative parthenogenesis are the most common results in  
280 resistance models. Rapid transitions to obligate parthenogenesis occur across a broad  
281 range of parameter space when the  $R$  and  $P$  alleles can become linked (i.e., in resistance  
282 models without prior sexual coevolution), but only if costs of resistance are not too high  
283 (Figure 1 D). However, in resistance models with prior sexual coevolution, outcomes for  
284 reproductive mode closely resemble those for coercion models (compare Figure 1 C and D).  
285 This is because the high resistance allele  $R$  (and the potential for linkage disequilibrium) is  
286 lost whenever there is prior sexual coevolution (Figure 4 A and B), and coercion  
287 consequently ensures the continued production of males.

### 288 ***Continuous-trait model***

289 In continuous-trait models where coercion and resistance can escalate in a coevolutionary  
290 arms races without limit, we find that  $P$ -allele frequencies and reproductive mode outcomes  
291 are intermediate between those of coercion and resistance discrete-trait models. This occurs  
292 because increases in coercion are rapidly counteracted by increases in resistance and vice  
293 versa. Thus, linkage disequilibrium between the  $P$  allele and alleles for high resistance is  
294 less likely to result in male extinction because males quickly counter-evolve more effective  
295 coercion. Conversely, coercion is less effective at constraining transitions from facultative to  
296 obligate parthenogenesis because females quickly counter-evolve more effective resistance  
297 which readily becomes linked with the  $P$  allele. Nonetheless, as with discrete-trait models,  $P$   
298 allele fixation becomes more likely as the intensity of sexual conflict increases. Detailed  
299 results for the continuous-trait model are reported in Supplementary Materials.

300

301

## 302 **DISCUSSION**

303 Our analysis allowed us to distinguish between instances of parthenogenetic reproduction  
304 facilitated by mate scarcity (i.e., parthenogenesis before initial mating attempts) and by  
305 resistance (i.e., parthenogenesis after initial mating attempts), and therefore to identify the  
306 role of each mechanism in the spread of facultative parthenogenesis and transitions to  
307 obligate parthenogenesis. We found that the *P* allele invaded successfully and displaced  
308 alleles for obligate sex across most of the realised parameter space due largely to the  
309 mechanism of mate scarcity. Even when all matings could be coerced, the *P* allele typically  
310 fixed, albeit slowly. High coercion was unable to prevent the invasion of facultative  
311 parthenogenesis because fecundity selection favoured females that produced additional  
312 offspring prior to encountering a mate, generating positive selection on the *P* allele.  
313 However, when successful resistance was possible, the *P* allele invaded across a greater  
314 portion of the parameter space because mate scarcity and resistance-mediated mechanisms  
315 acted in tandem, making parthenogenesis possible both before and after initial sexual  
316 encounters. In other words, the *P* allele conferred the greatest advantage and experienced  
317 the strongest positive selection when in positive linkage disequilibrium with alleles conferring  
318 a capacity for effective female resistance to mating. High resistance therefore increased the  
319 number of offspring produced parthenogenetically, and facilitated rapid and widespread  
320 fixation of the mutant allele.

321 The introduction of the *P* allele into obligately sexual populations led to one of three distinct  
322 evolutionary outcomes: obligate sex (*P* allele extinction), facultative parthenogenesis (*P*  
323 allele spread), or obligate parthenogenesis (extinction of males and consequent loss of sex).  
324 The distribution and frequency of each of these reproductive modes was strongly determined  
325 by the genetic architecture of sexual antagonism at the time of the *P* allele's emergence.  
326 When males successfully evolved the capacity to coerce any female to mate prior to  
327 introduction of the *P* allele, facultative parthenogenesis and obligate sex were the  
328 predominant outcomes, and male extinction rarely occurred. By contrast, when females

329 evolved effective resistance prior to introduction of the *P* allele, male extinction was the most  
330 common result. Importantly, this occurred both when coercion and resistance were modelled  
331 as traits determined by single loci (and therefore when evolution occurred via selection on  
332 standing genetic variation), and when coercion and resistance were modelled as multi-locus  
333 traits, representing a large mutational target and allowing sexual arms races to escalate  
334 without limit. This suggests that whenever effective resistance cannot evolve, male coercion  
335 can impede transitions to obligate parthenogenesis. By contrast, if coercion can be  
336 overcome by effective resistance, transitions to obligate asexuality are likely because linkage  
337 disequilibrium between the parthenogenesis allele and alleles for effective resistance allows  
338 females to avoid mating and its associated costs, leading to the extinction of males.

339 The limitations of resistance highlighted by our analysis have important implications for  
340 understanding the incidence of obligate sex and obligate parthenogenesis in nature. In some  
341 species, males appear to “win” sexual arms races due to intense and persistent selection for  
342 effective coercion, whether by mechanically overpowering females to force matings (Rowe et  
343 al. 1994), by chemical manipulation (Chapman et al. 1995; Andersson et al. 2004), or by pre-  
344 copulatory exploitation of sensory biases (Ryan et al. 1993; Holland and Rice 1998). High  
345 female resistance genotypes that can resist male coercion may be rare or absent from many  
346 populations due to strong selection against absolute resistance, or due to selection favouring  
347 convenience polyandry when costs of resistance are high (Rowe 1992). Moreover, many  
348 resistance behaviours are plastic, with virgin females often the least resistant to mating  
349 ((Ringo 1996); but see (Hosken et al. 2003)), while fixed strategies of high resistance are  
350 probably rare in natural populations. The absence of genetic variation for effective resistance  
351 may severely inhibit transitions to asexuality by ensuring the continued production of sons.  
352 However, parthenogens originating from interspecies hybridisation are often immediately  
353 reproductively isolated from their progenitors (Simon et al. 2003), and therefore released  
354 from sexual antagonism. This decoupling of parthenogenesis from effective resistance may

355 be one reason why many parthenogenetic animals – including all known obligately  
356 parthenogenetic vertebrates (Avisé et al. 1992; Simon et al. 2003) – have a hybrid origin.  
357 Theory suggests that facultative strategies should outcompete obligate sex (Green and  
358 Noakes 1995; Yamauchi and Kamite 2003). Indeed, our simulations show that facultative  
359 parthenogenesis can spread via the mate scarcity mechanism under a broad range of  
360 ecological and genetic conditions. Our analysis therefore suggests that the rarity of  
361 facultative parthenogenesis in animals may result from the nature of parthenogenetic  
362 mutants themselves. First, natural populations probably give rise to facultatively  
363 parthenogenetic mutants at very low rates (Schwander et al. 2010) because the complex  
364 cytological and physiological changes associated with parthenogenetic reproduction (such  
365 as spontaneous development of unreduced eggs) may require simultaneous mutations at  
366 multiple loci (Neiman et al. 2014). Second, even when they arise, facultative mutants may be  
367 less fecund than wild-type females (Lamb and Willey 1979), especially if the mechanism of  
368 parthenogenesis is meiotic (Levitis et al. 2017). For example, facultatively parthenogenetic  
369 mutants of the cockroach *Nauphoeta cinerea* produce one tenth as many offspring as non-  
370 mutant individuals (Corley and Moore 1999). Our simulations show that even a modest  
371 (50%) reduction in fecundity can reduce probability of invasion by parthenogenetic mutants.  
372 Third, physiological constraints that prevent females from reproducing parthenogenetically  
373 after mating could limit the spread of facultative strategies. Parthenogenetic reproduction  
374 after copulation appears to be rare in facultatively asexual diploid animals (e.g., (Chang et al.  
375 2014; Arbuthnott et al. 2015)), except when parthenogenesis is caused by maternally  
376 inherited endosymbiont bacteria (Arakaki et al. 2001; Werren et al. 2008). Fourth, the spread  
377 of mutants may be further constrained in nature by fitness costs associated with switching  
378 from parthenogenetic to sexual reproduction (Burke and Bonduriansky n.d.; Burke et al.  
379 2015). Such genetic constraints on parthenogenetic reproduction could therefore play key  
380 roles in preventing the invasion of obligately sexual populations by facultatively  
381 parthenogenetic mutants.

382 Nevertheless, our results generate a number of testable predictions. For example, if male  
383 coercion can inhibit the evolution of obligate parthenogenesis, taxa with greater potential for  
384 coercion may be less likely to exhibit obligately asexual forms. At a broad phylogenetic  
385 scale, the rarity of obligate asexuality in animals compared to plants (Otto and Whitton 2000)  
386 may reflect the greater range of opportunities in animal systems for behavioural and  
387 chemical coercion, such as chasing or holding mates (Rowe et al. 1994; den Hollander and  
388 Gwynne 2009), and transferring toxic ejaculates or anti-aphrodisiacs (Andersson et al. 2004;  
389 Wigby and Chapman 2005). Conversely, mate scarcity could play a more important role in  
390 plants given their immobility, and this may have selected for facultative asexuality via  
391 vegetative reproduction or selfing in many plant lineages. Comparative studies testing these  
392 predictions on a finer taxonomic scale may shed light on variation in reproductive strategies  
393 within animals, plants, and other eukaryotic lineages. However, such studies will need to  
394 quantify actual rates of parthenogenetic reproduction, the incidence and costs of resistance,  
395 the costs of mating, and the relative fecundity of sexual versus parthenogenetic reproduction  
396 in natural populations of facultative organisms, all of which remain poorly known.

397

## 398 **CONCLUSION**

399 Several recent studies suggest that sexual conflict could play a key role in the maintenance  
400 of sexual reproduction, and thus contribute to a resolution of the 'paradox of sex' (Kawatsu  
401 2013a,b, 2015; Burke et al. 2015; Gerber and Kokko 2016; Burke and Bonduriansky 2017).  
402 However, understanding the role of sexual conflict in the maintenance of obligate sex  
403 requires elucidating the ecological, demographic and genetic conditions whereby this factor  
404 can promote/inhibit invasions by facultatively asexual mutants in otherwise obligately sexual  
405 populations. In particular, given the potential for sexual conflict to interact with population  
406 density in facultative systems (Gerber and Kokko 2016), clearly differentiating the role of  
407 sexual conflict from the role of mate scarcity in mutant invasions is crucial. In this study, we



408 show that sexual conflict mediated by male coercion cannot prevent facultatively  
409 parthenogenetic mutants invading sexual populations because fecundity selection favours  
410 mutant females that reproduce prior to encountering males (mate scarcity mechanism). The  
411 rarity of facultative parthenogenesis in some lineages therefore suggests important genetic  
412 constraints on parthenogenetic reproduction. However, we also show that the probability of  
413 facultative populations transitioning to obligate asexuality depends largely on the potential  
414 for females to evolve effective, low-cost resistance to mating, and the possibility for linkage  
415 disequilibrium to build up between alleles for female resistance and alleles for facultative  
416 parthenogenesis. Although females may benefit by reproducing parthenogenetically instead  
417 of sexually, obligate parthenogenesis is likely to evolve only if females can overcome male  
418 coercion and thereby reproduce without paying the costs of sex. The difficulty of such a feat  
419 suggests that sex may be an evolutionary trap imposed on populations by the evolution of  
420 coercive males.

421

422

423

424

425

426

427

428

429

430

431 **REFERENCES**

- 432 Andersson, J., A. K. Borg-Karlson, and C. Wiklund. 2004. Sexual conflict and anti-  
433 aphrodisiac titre in a polyandrous butterfly: male ejaculate tailoring and absence of  
434 female control. *Proc. R. Soc. B Biol. Sci.* 271:1765–1770.
- 435 Arakaki, N., T. Miyoshi, and H. Noda. 2001. Wolbachia-mediated parthenogenesis in the  
436 predatory thrips *Franklinothrips vespiformis* (Thysanoptera: Insecta). *Proc. Biol. Sci.*  
437 268:1011–6.
- 438 Arbuthnott, D., B. J. Crespi, and T. Schwander. 2015. Female stick insects mate multiply to  
439 find compatible mates. *Am. Nat.* 186:519–530.
- 440 Arnqvist, G., and L. Rowe. 2005. *Sexual Conflict*. Princeton University Press, Princeton.
- 441 Avise, J. C., J. M. Quattro, and R. C. Vrijenhoek. 1992. Molecular clones within organismal  
442 clones: mitochondrial DNA phylogenies and the evolutionary histories of unisexual  
443 vertebrates. *Evol. Biol.* 26:225–246.
- 444 Bell, G. 1988. Recombination and the immortality of the germ line. *J. Evol. Biol.* 1:67–82.
- 445 Bell, G. 1982. *The Masterpiece of Nature: The Evolution and Genetics of Sexuality*.  
446 University of California Press, Berkeley.
- 447 Brittain, J. E. 1982. Biology of mayflies. *Annu. Rev. Entomol.* 27:119–147.
- 448 Burke, N. W., and R. Bonduriansky. 2017. Sexual Conflict, Facultative Asexuality, and the  
449 True Paradox of Sex. *Trends Ecol. Evol.* 32:646–652.
- 450 Burke, N. W., and R. Bonduriansky. n.d. Sexual conflict during juvenile life-stages mediates  
451 a reduction in asexual fitness. Under Prep.
- 452 Burke, N. W., and R. Bonduriansky. n.d. The fitness effects of delayed sex in a facultatively  
453 asexual insect. Submitted.
- 454 Burke, N. W., A. J. Crean, and R. Bonduriansky. 2015. The role of sexual conflict in the  
455 evolution of facultative parthenogenesis: a study on the spiny leaf stick insect. *Anim.*  
456 *Behav.* 101:117–127.
- 457 Chang, C. C., C. T. Ting, C. H. Chang, S. Fang, and H. Y. Chang. 2014. The persistence of  
458 facultative parthenogenesis in *Drosophila albomicans*. *PLoS One* 9:1–18.
- 459 Chapman, T., L. F. Liddle, J. M. Kalb, M. F. Wolfner, and L. Partridge. 1995. Cost of mating  
460 in *Drosophila melanogaster* females is mediated by male accessory-gland products.  
461 *Nature* 373:241–244.
- 462 Corley, L. S., and A. J. Moore. 1999. Fitness of alternative modes of reproduction:  
463 developmental constraints and the evolutionary maintenance of sex. *Proc. R. Soc. B*  
464 *Biol. Sci.* 266:471–476.
- 465 D'Souza, T. G., and N. K. Michiels. 2010. The costs and benefits of occasional sex:  
466 theoretical predictions and a case study. *J. Hered.* 101:S34–S41.
- 467 den Hollander, M., and D. T. Gwynne. 2009. Female fitness consequences of male  
468 harassment and copulation in seed beetles, *Callosobruchus maculatus*. *Anim. Behav.*  
469 78:1061–1070.
- 470 Engelstadter, J. 2008. Constraints on the evolution of asexual reproduction. *Bioessays*  
471 30:1138–1150.

- 472 Flatt, T., N. Maire, and M. Doebeli. 2001. A bit of sex stabilizes host-parasite dynamics. *J.*  
473 *Theor. Biol.* 212:345–54.
- 474 Gavrillets, S. 2000. Rapid evolution of reproductive barriers driven by sexual conflict. *Nature*  
475 403:886–889.
- 476 Gerber, N., and H. Kokko. 2016. Sexual conflict and the evolution of asexuality at low  
477 population densities. *Proc. R. Soc. B Biol. Sci.* 283:20161280.
- 478 Gerritsen, J. 1980. Sex and parthenogenesis in sparse populations. *Am. Nat.* 115:718–742.
- 479 Green, R. F., and D. L. G. Noakes. 1995. Is a little bit of sex as good as a lot. *J. Theor. Biol.*  
480 174:87–96.
- 481 Greenway, E. V., L. R. Dougherty, and D. M. Shuker. 2015. Mating failure. *Curr. Biol.*  
482 25:R534–R536.
- 483 Hamilton, W. D. 1980. Sex versus non-sex versus parasite. *Oikos* 35:282–290.
- 484 Härdling, R., and A. Kaitala. 2005. The evolution of repeated mating under sexual conflict. *J.*  
485 *Evol. Biol.* 18:106–115.
- 486 Holland, B., and W. R. Rice. 1998. Perspective: Chase-away sexual selection: Antagonistic  
487 seduction versus resistance. *Evolution (N. Y.)*. 52:1–7.
- 488 Hosken, D. J., O. Y. Martin, J. Born, and F. Huber. 2003. Sexual conflict in *Sepsis cynipsea*:  
489 female reluctance, fertility and mate choice. *J. Evol. Biol.* 16:485–490. Blackwell  
490 Science Ltd.
- 491 Hurst, L. D., and J. R. Peck. 1996. Recent advances in understanding of the evolution and  
492 maintenance of sex. *Trends Ecol. Evol.* 11:46–52.
- 493 Johnson, S. G. 1994. Parasitism, reproductive assurance and the evolution of reproductive  
494 mode in a freshwater snail. *Proc. R. Soc. B Biol. Sci.* 255:209–213.
- 495 Kawatsu, K. 2015. Breaking the parthenogenesis fertilization barrier: direct and indirect  
496 selection pressures promote male fertilization of parthenogenetic females. *Evol. Ecol.*  
497 29:49–61.
- 498 Kawatsu, K. 2013a. Sexual conflict over the maintenance of sex: effects of sexually  
499 antagonistic coevolution for reproductive isolation of parthenogenesis. *PLoS One*  
500 8:e58141.
- 501 Kawatsu, K. 2013b. Sexually antagonistic coevolution for sexual harassment can act as a  
502 barrier to further invasions by parthenogenesis. *Am. Nat.* 181:223–234.
- 503 Kondrashov, A. S. 1988. Deleterious mutations and the evolution of sexual reproduction.  
504 *Nature* 336:435–440.
- 505 Kondrashov, A. S. 1984. Deleterious mutations as an evolutionary factor. 1. The advantage  
506 of recombination. *Genet. Res.* 44:199–217.
- 507 Lamb, R. Y., and R. B. Willey. 1979. Are parthenogenetic and related bisexual insects equal  
508 in fertility? *Evolution (N. Y.)*. 33:774–775.
- 509 Levitis, D. A., K. Zimmerman, and A. Pringle. 2017. Is meiosis a fundamental cause of  
510 inviability among sexual and asexual plants and animals? *Proc. R. Soc. London B Biol.*  
511 *Sci.* 284.

- 512 Lynch, M., and W. Gabriel. 1983. Phenotypic evolution and parthenogenesis. *Am. Nat.*  
513 122:745.
- 514 Maklakov, A. A., T. Bilde, and Y. Lubin. 2005. Sexual conflict in the wild: elevated mating  
515 rate reduces female lifetime reproductive success. *Am. Nat.* 165 Suppl:S38–S45.
- 516 Markow, T. A. 2013. Parents Without Partners: *Drosophila* as a Model for Understanding the  
517 Mechanisms and Evolution of Parthenogenesis. *G3* 3:757–762. Genetics Society of  
518 America.
- 519 Martin, O. Y., and D. J. Hosken. 2003. Costs and benefits of evolving under experimentally  
520 enforced polyandry or monogamy. *Evolution (N. Y.)*. 57:2765–2772.
- 521 Maynard Smith, J. 1978. *The Evolution of Sex*. Cambridge University Press, Cambridge.
- 522 Neiman, M., T. F. Sharbel, and T. Schwander. 2014. Genetic causes of transitions from  
523 sexual reproduction to asexuality in plants and animals. *J. Evol. Biol.*, doi:  
524 10.1111/jeb.12357.
- 525 Otto, S. P., and N. H. Barton. 1997. The evolution of recombination: Removing the limits to  
526 natural selection. *Genetics* 147:879–906.
- 527 Otto, S. P., and J. Whitton. 2000. Polyploid incidence and evolution. *Annu. Rev. Genet.*  
528 34:401–437.
- 529 Parker, G. A. 1979. Sexual selection and sexual conflict. Pp. 123–166 *in* N. Blum and M.  
530 Blum, eds. *Sexual Selection and Reproductive Competition in Insects*. Academic Press,  
531 New York.
- 532 Peck, J. R., and D. Waxman. 2000. Mutation and sex in a competitive world. 406:399–404.
- 533 Rice, W. R., and B. Holland. 1997. The enemies within: intergenomic conflict, interlocus  
534 contest evolution (ICE), and the intraspecific Red Queen.
- 535 Ringo, J. 1996. Sexual receptivity in insects. *Annu. Rev. Entomol.* 41:473–494.
- 536 Rowe, L. 1992. Convenience polyandry in a water strider: foraging conflicts and female  
537 control of copulation frequency and guarding duration. *Anim. Behav.* 44:189–202.
- 538 Rowe, L., G. Arnqvist, A. Sih, and J. J. Krupa. 1994. Sexual conflict and the evolutionary  
539 ecology of mating patterns: Water striders as a model system. *Trends Ecol. Evol.*  
540 9:289–293.
- 541 Ryan, M. J., A. S. Rand, M. J. Ryan<sup>1</sup>, and A. A. Stanley. 1993. Sexual Selection and Signal  
542 Evolution: The Ghost of Biases past. *Source Philos. Trans. Biol. Sci.* 340:187–195.
- 543 Sasaki, A., and Y. Iwasa. 1987. Optimal recombination rate in fluctuating environments.  
544 *Genetics* 115:377–388.
- 545 Schartl, A., U. Hornung, I. Nanda, R. Wacker, H. K. Müller-Hermelink, I. Schlupp, J.  
546 Parzefall, M. Schmid, and M. Schartl. 1997. Susceptibility to the development of  
547 pigment cell tumors in a clone of the Amazon Molly, *Poecilia formosa*, introduced  
548 through a microchromosome. *Cancer Res.* 57:2993–3000.
- 549 Schwander, T., and B. J. Crespi. 2009. Multiple direct transitions from sexual reproduction to  
550 apomictic parthenogenesis in *Timema* stick insects. *Evolution (N. Y.)*. 63:84–103.
- 551 Schwander, T., S. Vuilleumier, J. Dubman, and B. J. Crespi. 2010. Positive feedback in the

552 transition from sexual reproduction to parthenogenesis. *Proc. R. Soc. B Biol. Sci.*  
553 277:1435–1442.

554 Simon, J. C., F. Delmotte, C. Rispe, and T. Crease. 2003. Phylogenetic relationships  
555 between parthenogens and their sexual relatives: the possible routes to  
556 parthenogenesis in animals. *Biol. J. Linn. Soc.* 79:151–163.

557 Wagner, G. P., and W. Gabriel. 1990. Quantitative variation in finite parthenogenetic  
558 populations: what stops Muller's ratchet in the absence of recombination? *Evolution*  
559 (N. Y). 44:715–731.

560 Werren, J. H., L. Baldo, and M. E. Clark. 2008. Wolbachia: master manipulators of  
561 invertebrate biology. *Nat. Rev Microbiol* 6:741–751.

562 Wigby, S., and T. Chapman. 2005. Sex peptide causes mating costs in female *Drosophila*  
563 *melanogaster*. *Curr. Biol.* 15:316–321.

564 Wilensky, U. 1999. NetLogo. Center for Connected Learning and Computer-Based  
565 Modeling, Northwestern University, Evanston.

566 Yamauchi, A. 1999. Evolution of cyclic sexual reproduction under host-parasite interactions.  
567 *J. Theor. Biol.* 201:281–291.

568 Yamauchi, A., and Y. Kamite. 2003. Facultative sexual reproduction under frequency-  
569 dependent selection on a single locus. *J. Theor. Biol.* 221:411–424.

570

571

572

573

574

575

576

577

578

579

580

581

582

583

584

585

586 **Table 1**

587 **Mating outcomes for discrete-trait models**

588 Male coercion genotypes can mate with any female resistance genotype positioned below  
589 them in the table, and resistance genotypes can resist mating attempts from any coercion  
590 genotype below them in the table. Thus, in coercion models, *CC* males can mate with any  
591 female genotype, *Cc* males can mate with *Rr* or *rr* females, and *cc* males can mate with *rr*  
592 females. In resistance models, *CC* males can mate with *Rr* or *rr* females, *Cc* males can mate  
593 with *rr* females, and *cc* males cannot mate with any females. Similarly, in coercion models,  
594 *RR* females can resist mating attempts from *Cc* and *cc* males, *Rr* females can resist mating  
595 attempts from *cc* males, and *rr* females cannot resist any mating attempts. In resistance  
596 models, *RR* females can resist mating attempts from all male genotypes, *Rr* females can  
597 resist mating attempts from *Cc* and *cc* males, and *rr* females can resist mating attempts from  
598 *cc* males.

599

| Coercion model | Resistance model |
|----------------|------------------|
| <i>CC</i>      | <i>RR</i>        |
| <i>RR</i>      | <i>CC</i>        |
| <i>Cc</i>      | <i>Rr</i>        |
| <i>Rr</i>      | <i>Cc</i>        |
| <i>cc</i>      | <i>rr</i>        |
| <i>rr</i>      | <i>cc</i>        |

600

601

602

603

604

605

606

607

608

609

610

611

612

613

614 **Table 2**

615 **Parameters used in simulations of discrete-trait models**

| Parameter                                           | Description                                                                                                                                                                                     | Parameter levels investigated                                                                                                                                                                                              |
|-----------------------------------------------------|-------------------------------------------------------------------------------------------------------------------------------------------------------------------------------------------------|----------------------------------------------------------------------------------------------------------------------------------------------------------------------------------------------------------------------------|
| <b>Number of patches</b>                            | The number of patches that make up the world, which determines population density                                                                                                               | High (2,601 patches; 'low density')<br>Low (121 patches; 'high density')                                                                                                                                                   |
| <b>Cost per mating for males</b>                    | The number of time-steps deducted from male lifespan per mating                                                                                                                                 | 0<br>5<br>10<br>15<br>20                                                                                                                                                                                                   |
| <b>Cost per mating for females</b>                  | The number of time-steps deducted from female lifespan per mating                                                                                                                               | 0<br>5<br>10<br>15<br>20                                                                                                                                                                                                   |
| <b>Relative efficacy of coercion and resistance</b> | The trait that has the upper hand in sexual encounters                                                                                                                                          | 'Coercion can beat resistance' (i.e., males with the most coercive genotype can mate with any female)<br><br>'Resistance can beat coercion' (i.e., females with the most resistant genotype can resist any mating attempt) |
| <b>Cost of resistance</b>                           | The number of time-steps deducted from the lifespan of females that successfully resist                                                                                                         | 0 ('resistance not costly')<br>10 ('resistance costly')                                                                                                                                                                    |
| <b>Timing of <i>P</i> allele introduction</b>       | The time-step at which mutants carrying the <i>P</i> allele are introduced into the population, which determines whether or not populations experience sexual coevolution prior to introduction | 0 ('no prior sexual coevolution')<br>10,000 ('prior sexual coevolution')                                                                                                                                                   |
| <b>Cost of parthenogenesis</b>                      | The proportion of fecundity lost by parthenogenetic females relative to sexual females                                                                                                          | 0 ('parthenogenesis not costly')<br>0.5 ('parthenogenesis costly')                                                                                                                                                         |

616

617

618

619

620

621

622

623

624

625

626 **Figure 1**  
 627 **Evolutionary outcomes following the introduction of the *P* allele for discrete-trait models where the cost per mating is equivalent for**  
 628 **each sex.**

629 The cost per mating for females reflects the intensity of sexual conflict, whereas the cost per mating for males is set at the same value as for females  
 630 to maintain near-equal sex ratios. Left-hand graphs (A and C) are from coercion models; right-hand graphs (B and E) are from resistance models.  
 631 Upper graphs (A and B) show *P* allele outcomes; lower graphs (C and D) show reproductive mode outcomes. White regions indicate parameter  
 632 spaces where population extinction occurred before simulations ended. The likelihood of *P* allele fixation (dark orange) increases in panels A and B as  
 633 costs per mating (and the consequent intensity of sexual conflict) increase along the x-axis. The probability of simulations ending in obligate  
 634 parthenogenesis (dark blue in panels C and D) also increases as costs per mating increase. The *P* allele easily fixes in panel A, especially when  
 635 population density is low, because fecundity selection favours the production of parthenogens when mates are scarce, even though males in these  
 636 simulations can coerce any female to mate. However, the success of the *P* allele in panel A does not translate to widespread obligate  
 637 parthenogenesis in panel C because coercion ensures the continued production of males when females cannot resist effectively. Instead, obligate sex  
 638 and facultative parthenogenesis are the most common outcomes in panel C. The *P* allele fixes more often in panel B than in panel A because  
 639 resistance can beat coercion in these simulations. Transitions to obligate parthenogenesis are also more extensive in panel D than panel C because  
 640 linkage disequilibrium can build up between the *P* allele and alleles for high resistance when resistance beats coercion and when there is no prior  
 641 sexual coevolution. However, resistance costs greatly limit the success of parthenogenetic strategies in panels B and D when population density (and  
 642 therefore sexual conflict) is high. N = 25 simulations for each parameter combination.

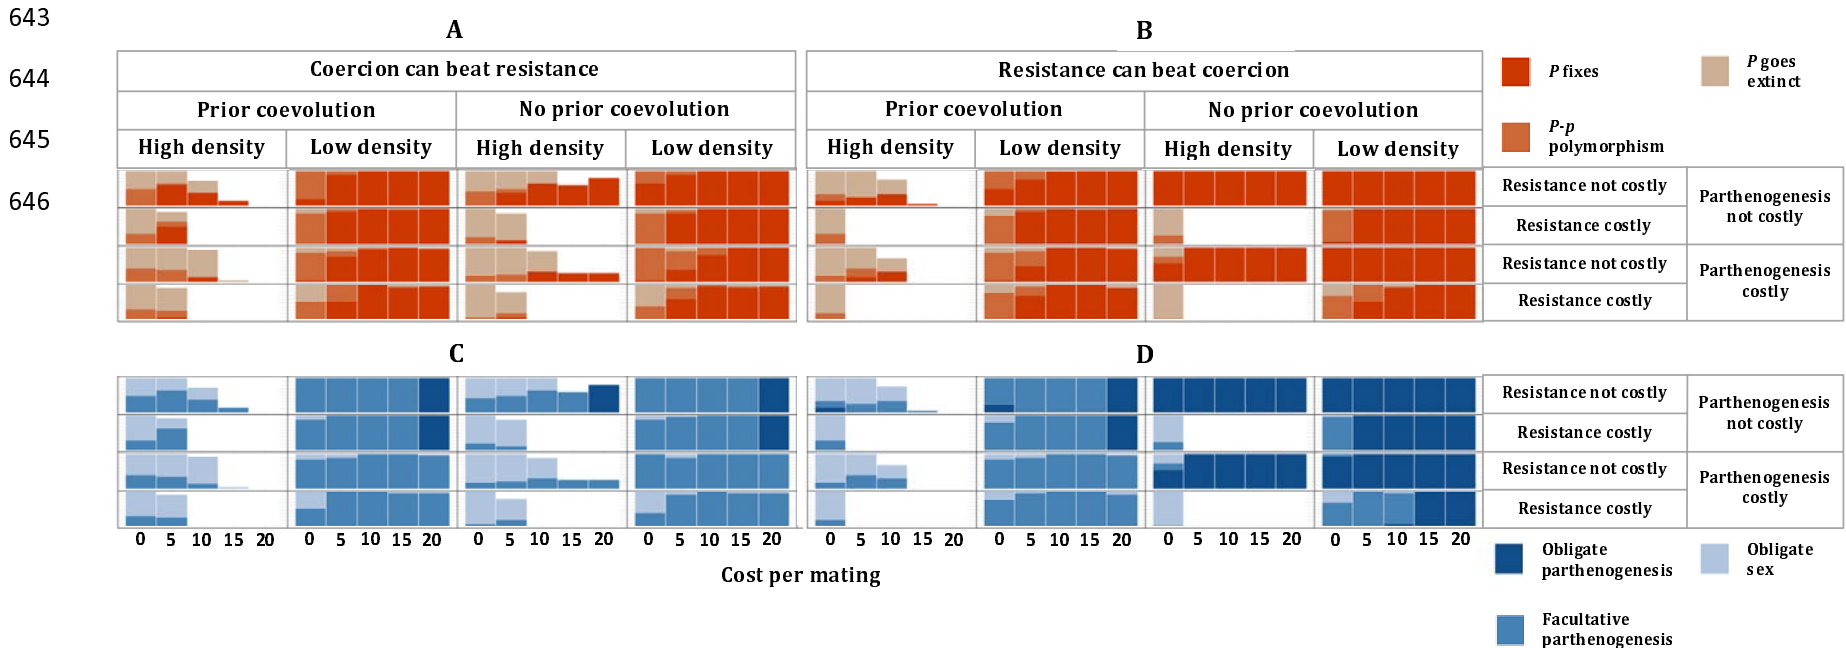



647 **Figure 2**  
648 **Mean cumulative sum (+ SE) of offspring produced by female genotypes.**

649 Data are obtained from the first 1,200 time-steps of simulations of resistance models where  
650 the *P* allele is introduced without prior sexual coevolution, allowing linkage disequilibrium to  
651 build up between *R* and *P*. The parthenogenesis allele *P* is most successful when  
652 associated with the most resistant female genotype *RR*. Other parameters are: number of  
653 patches: high; cost of resistance: 0; cost of parthenogenesis: 0; female mating cost: 10; male  
654 mating cost: 10. N = 25 simulations.

655

656

657

658

659

660

661

662

663

664

665

666

667

668

669

670

671

672

673

674

675

676

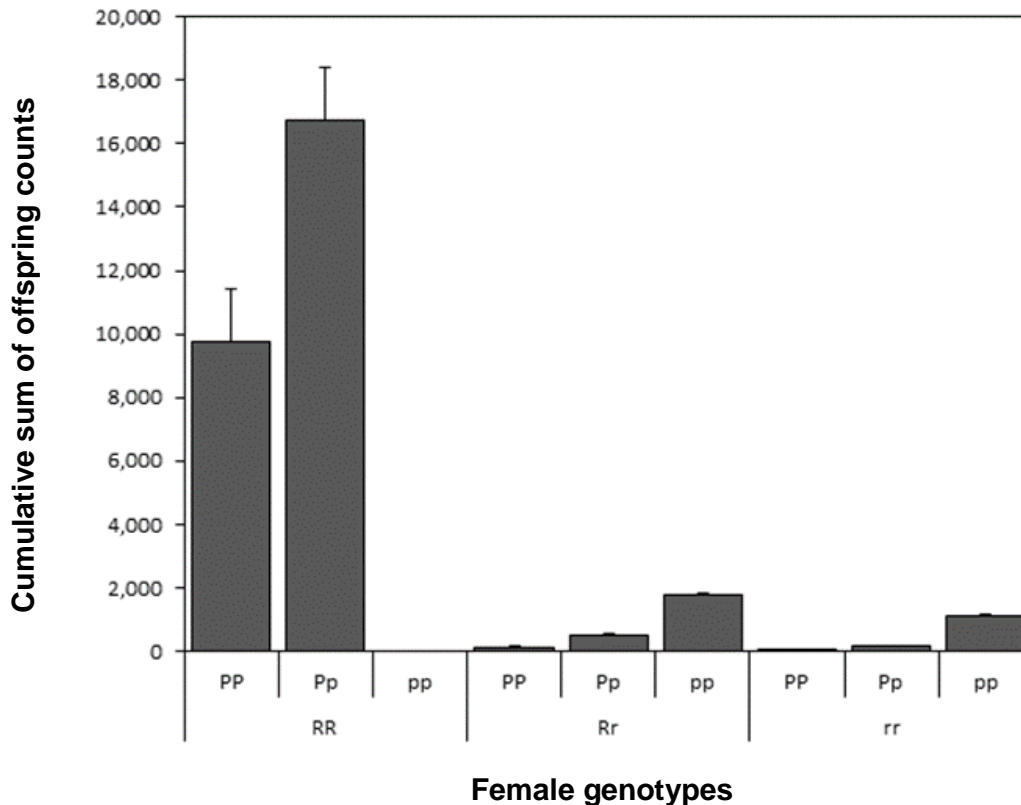

677 **Figure 3**  
678 **Mean proportion (+ SE) of offspring produced parthenogenetically by females of**  
679 **different resistance genotypes during the first 300 and 1,200 time-steps of simulation**  
680 **runs before and after initial sexual encounters.**

681 In coercion models (A), most parthenogenetic reproduction occurs before females encounter  
682 males (i.e., via the mate scarcity mechanism). This proportion increases as time elapses  
683 (contrast the proportion of parthenogenetic reproduction during the first 300 time-steps  
684 versus over 1,200 time-steps). Conversely, in resistance models (B), during the first 300  
685 time-steps, parthenogenetic reproduction occurs more frequently *after* mate encounters (i.e.,  
686 via resistance). But over 1,200 time-steps, parthenogenetic reproduction occurs more  
687 frequently *before* mate encounters (i.e., via mate scarcity). In both cases, *RR* females  
688 produce the most offspring parthenogenetically. In these simulations, *P* is introduced without  
689 prior sexual coevolution, with other parameters as in Figure 2.

690

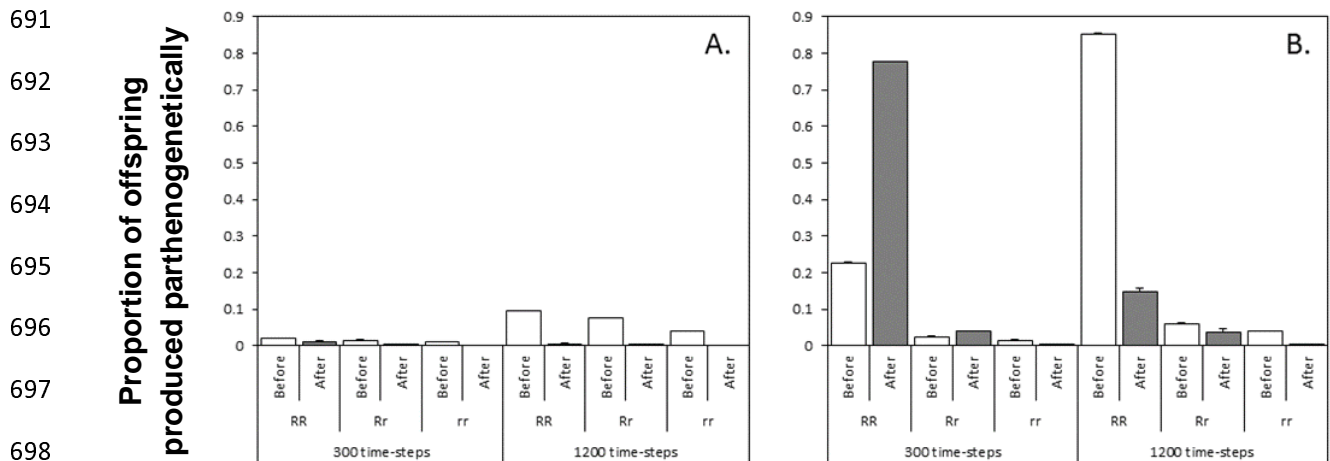

709 **Figure 4**  
 710 **Time-dependent changes in male coercion and female resistance genotypes for a**  
 711 **single simulation per mating-cost combination.**

712 Left-hand graphs (A and C) are from coercion models; right-hand graphs (B and D) are from  
 713 resistance models. The top graphs (A and B) are from models in which the *P* allele is  
 714 introduced following prior sexual coevolution; whereas lower graphs (C and D) are from  
 715 models in which the *P* allele is introduced without prior sexual coevolution. Arrows indicate  
 716 the time-step at which the *P* allele is introduced. Other parameter settings are: number of  
 717 patches: high (i.e., low density); cost of resistance: 0; cost of parthenogenesis: 0. In coercion  
 718 models (A, C), the high-coercion *C* allele (dark blue) rapidly fixes, but directional selection on  
 719 female resistance ceases following *C* fixation. In resistance models with prior sexual  
 720 coevolution (B), sexually antagonistic selection fixes both the weakest resistance allele, *r*  
 721 (yellow), and the strongest coercion allele, *C*; in resistance models with no prior sexual  
 722 coevolution (D), there is strong directional selection for the high-resistance allele, *R*, as  
 723 linkage disequilibrium builds up between parthenogenesis and resistance.

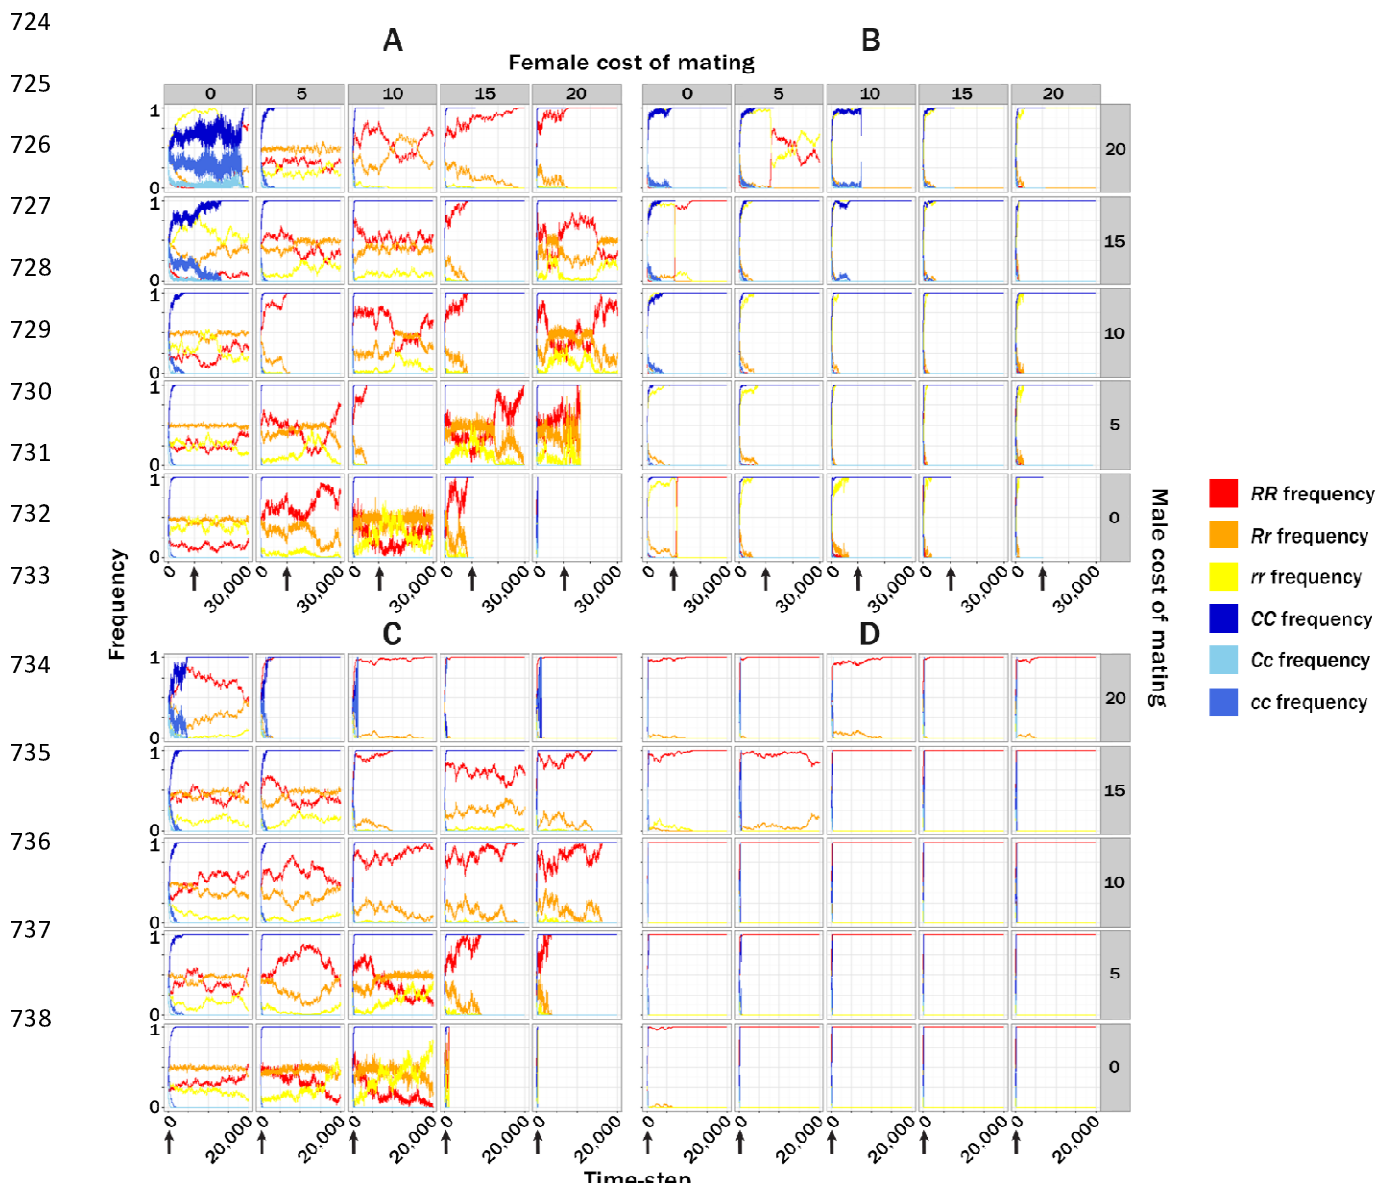

Source: https://www.biorxiv.org/content/10.1101/146076v2.full.pdf
